# Supplementary material for: Parathyroid hormone attenuates osteoarthritis pain by remodeling subchondral bone in mice
Source: eLife. 2021 Mar 1;10:e66532. doi: 10.7554/eLife.66532 (PMC8012060; doi:10.7554/eLife.66532)
Supplement: Figure 1—source data 1. [file elife-66532-fig1-data1.xlsx]

## Sheet: Sheet1
	PAMWT
		Sham								Vehicle								PTH
	Pre-Sur	475	465	452	451	449	439	444	427	475	459	455	452	449	448	440	426	480	466	450	451	449	449	434	420
	1W	269	254	251	240	239	228	221	206	267	255	250	240	238	231	222	232	261	248	236	230	232	230	219	203
	2W	344	326	317	313	313	311	295	283	312	297	289	284	281	275	266	254	275	288	301	306	307	311	322	333
	3W	421	409	397	386	385	383	372	362	376	363	355	345	339	330	323	314	400	379	380	376	369	368	348	336
	4W	455	442	433	432	430	429	413	398	392	376	372	352	350	339	333	318	426	412	395	392	380	377	367	355
	5W	461	447	436	435	432	429	428	415	386	368	359	354	350	345	336	324	432	420	399	391	390	389	374	363
	6W	474	472	472	470	465	463	434	432	354	344	332	325	321	315	308	294	418	400	385	378	371	364	355	344
	7W	468	467	458	456	455	448	436	427	335	324	316	311	301	285	280	269	390	379	365	352	354	351	339	322
	8W	466	456	450	449	444	442	440	430	313	308	296	287	283	280	270	256	384	371	357	348	339	332	320	306
	50%PWT
		Sham								Vehicle								PTH
	Pre-Sur	1.44799	1.21244	1.44799	1.16612	1.21244	1.21131	1.08037	1.04893	1.21244	1.21131	1.16612	1.21244	1.219	1.44202	1.16612	1.16612	1.33011	1.2281	1.219	1.21244	1.21131	1.17022	1.16612	1.1153
	1W	0.878156	0.877517	0.873983	0.852604	0.849122	0.833232	0.71394	0.713273	0.878156	0.877517	0.873983	0.852604	0.849122	0.833232	0.71394	0.713273	0.574426	0.930955	0.878156	0.877517	0.873983	0.852604	0.849122	0.833232
	2W	0.833232	0.71394	0.930955	0.622139	0.877517	0.947171	0.930955	0.878156	0.574426	0.930955	0.878156	0.877517	0.852604	0.686664	0.674417	0.673391	0.59802	0.574426	0.852604	0.849122	0.873983	0.852604	0.849122	0.833232
	3W	1.219	1.21244	1.21131	1.17022	1.16612	1.1153	1.08115	1.08037	0.622139	0.686664	0.574426	0.930955	0.574426	0.713273	0.70146	0.686664	0.877517	0.849122	0.930955	0.878156	0.833232	0.849122	0.878156	0.622139
	4W	1.1153	1.01558	1.1153	1.08115	1.08037	1.04893	1.01558	1.219	0.59802	0.574426	0.713273	0.70146	0.673391	0.622139	0.59802	0.574426	0.852604	0.849122	0.833232	0.71394	0.873983	0.852604	0.849122	0.833232
	5W	1.17022	1.16612	1.33011	1.43968	1.219	1.21244	1.21131	1.17022	0.505326	0.548187	0.514639	0.505326	0.490643	0.490622	0.41305	0.514639	0.877517	0.873983	0.852604	0.849122	0.833232	0.71394	0.713273	0.70146
	6W	1.43968	1.33011	1.2281	1.219	1.21244	1.17022	1.16612	1.1153	0.514639	0.505326	0.686664	0.505326	0.557736	0.548187	0.41305	0.505326	0.877517	0.873983	0.852604	0.849122	0.70146	0.686664	0.674417	0.673391
	7W	1.08115	1.08037	1.21244	1.16612	1.21131	1.33011	1.21131	1.17022	0.505326	0.490643	0.490622	0.41305	0.41305	0.490643	0.490643	0.490622	0.849122	0.833232	0.574426	0.713273	0.70146	0.686664	0.674417	0.673391
	8W	1.43968	1.33011	1.2281	1.21131	1.16612	1.21244	1.21131	1.08037	0.514639	0.505326	0.490643	0.490622	0.41305	0.490643	0.396522	0.366342	0.622139	0.59802	0.574426	0.713273	0.833232	0.877517	0.833232	0.852604
	intensity
		Sham								Vehicle								PTH
	4W	102	101	111.2	98.6	102.2	100	101.8	102.4	83.2	91	77.2	79.4	87.8	84.4	83	81.6	89.9	98.5	82.1	84.3	93.3	91.5	88.5	90.7
	8W	102	97.6	92.6	97	97.8	98.4	106.4	102.8	72	60.6	72	83.4	63.4	73.8	67.2	68.8	85	78.6	70	82.4	92.4	84.4	88.2	87.2
	contact area
		Sham								Vehicle								PTH
	4W	99.6	102.2	103.8	103.8	95.8	98	98.4	98.6	91	81.2	88.2	91	92.4	92.8	88.8	93.8	95.6	91.6	88.4	95	95.4	98.2	103.8	97
	8W	98.8	102.4	100.4	96.2	95.6	105.8	96.2	98.8	66.6	69.6	75.8	82.2	80.8	76.2	77	86.2	84.8	83.8	75.4	92.2	84.8	80.4	87.6	85.2
	Swing speed
		Sham								Vehicle								PTH
	4W	101	100.4	100.2	102.2	101.6	99.6	96.4	98.2	91.8	81.8	84.8	87.8	90.2	98.8	92.2	89.8	95	90.6	91.4	93.2	95	97.8	99.4	98.2
	8W	103.2	101.4	102.2	101.6	102	101	100	96.6	77.8	69.1	79.8	75	85	81.4	76.8	71.8	76	74.6	86	87.4	92.4	88.2	89.2	83.4
	OARSI
		Sham								Vehicle								PTH
	2W	1	0	1	0	0	0	1	0	4	2	2	1	2	4	3	2	3	1	2	2	1	3	2	0
	4W	0	0	1	0	0	1	1	0	2	3	6	4	3	4	4	6	4	1	2	3	3	2	3	2
	8W	0	0	0	0	1	1	1	1	9	12	9	9	8	9	12	9	6	4	8	6	6	6	4	6
	COLX					MMP13
	Sham	Vehicle	PTH			Sham	Vehicle	PTH
	14.286	37.5	27.277			13.333	37.5	25.481
	15.094	43.103	25			15.714	33.333	23.535
	14.035	42.857	35.862			13.889	29	28.987
	12.903	49.889	30.333			10.294	37.5	25.627
	18.644	32.849	23.636			15.254	36.364	21.544
	15.254	42.857	26.415			15.789	30.189	22.543
	14.014	38.095	30.37			18.667	42.124	24.718
	16.35	44.955	26.925			20.025	40.245	24.9
