# Supplementary material for: Parathyroid hormone attenuates osteoarthritis pain by remodeling subchondral bone in mice
Source: eLife. 2021 Mar 1;10:e66532. doi: 10.7554/eLife.66532 (PMC8012060; doi:10.7554/eLife.66532)
Supplement: Figure 2—figure supplement 1—source data 1. [file elife-66532-fig2-figsupp1-data1.xlsx]

## Sheet: Sheet1
	P2X3					PIZEO2
	Sham	Vehicle	PTH			Sham	Vehicle	PTH
	1.02	3.486	1.9095			0.834211	3.00053	1.99082
	1.01	3.1416	2.54025			0.971053	3.55901	2.63081
	1	2.9562	1.9701			0.884211	2.35794	2.25875
	0.946	2.409	2.4636			0.905263	3.39755	2.94359
	1.02	3.768	2.2287			1.11842	2.9029	2.30841
	0.976	3.6765	2.1447			1.03421	2.72597	2.0813
	0.926	3.2604	2.33895			0.921053	3.13508	2.6065
	0.97	4.48005	3.01605			1.08421	3.39079	2.61703
