# Supplementary material for: Parathyroid hormone attenuates osteoarthritis pain by remodeling subchondral bone in mice
Source: eLife. 2021 Mar 1;10:e66532. doi: 10.7554/eLife.66532 (PMC8012060; doi:10.7554/eLife.66532)
Supplement: Figure 2—source data 1. [file elife-66532-fig2-data1.xlsx]

## Sheet: Sheet1
			CGRP stainig					SP stainig					EMUN stainig					CGRP stainig In synovium
			Sham	Vehicle	PTH			Sham	Vehicle	PTH			Sham	Vehicle	PTH			Sham	Vehicle	PTH
			0.966834	4.31086	2.40825			0.978	3.19936	2.56347			0.940552	4.31621	2.55029			1.02	3.69787	3.74806
			0.960804	4.05698	3.31909			0.984	3.07547	3.08432			0.94823	3.99978	2.403			1.01	3.8829	3.62208
			1.06332	5.56159	2.80274			1.064	4.4501	2.56795			0.894999	4.29413	2.26217			1.21579	4.64243	3.91344
			0.926633	5.3937	3.24967			1.028	4.6722	3.0149			1.22027	4.58744	2.17406			1.11053	4.05652	4.92898
			1.06734	4.8982	3.03693			0.947368	3.9037	2.74228			0.870237	3.47086	2.44696			1.16053	3.81045	3.18556
			1.0392	4.77048	2.96088			0.797368	3.77598	2.66623			1.19394	3.62769	2.76997			1.14737	3.69546	4.40958
			1.02714	4.6876	3.13677			0.947368	3.69311	2.84212			0.935856	3.18211	3.40301			0.947368	2.95512	3.35094
			1.02111	5.2234	3.74985			1.09737	4.2289	3.4552			0.995916	4.21262	2.15707			0.797368	4.43917	4.36648
			osteophyte volume					COX2 stainig
			Sham	Vehicle	PTH			Sham	Vehicle	PTH
			0	0.02615	0.0216			44	471.2	349.6
			0	0.02105	0.0252			11	338.2	250.8
			0	0.01925	0.02			38	307.8	338.2
			0	0.01515	0.01935			44	300.2	239.4
			0	0.0151	0.02265			31	570	163.4
			0	0.0137	0.02755			28	501.6	364.8
			0	0.0185	0.01575			29	497.8	231.8
			0	0.02015	0.01935			43	463.6	216.6
			level of PGE2
				Sham								Vehicle								PTH
			4W	0.100038	0.433311	0.22405	0.23182	0.267761	0.19598	0.195391	0.278557	1.27977	1.07571	1.27977	0.918417	1.36204	1.07001	1.0348	1.41758	0.295458	0.142773	0.334798	0.370851	0.558297	0.639863	0.383712	0.58426
			8W	0.098939	0.428549	0.240053	0.248378	0.382516	0.071975	0.113393	0.251217	1.2637	1.09842	1.03573	0.7421	0.8342	0.9986	0.739565	0.818417	0.571456	0.389508	0.760036	0.565586	0.491258	0.639986	0.539565	0.518426
