# Supplementary material for: Parathyroid hormone attenuates osteoarthritis pain by remodeling subchondral bone in mice
Source: eLife. 2021 Mar 1;10:e66532. doi: 10.7554/eLife.66532 (PMC8012060; doi:10.7554/eLife.66532)
Supplement: Figure 3—source data 1. [file elife-66532-fig3-data1.xlsx]

## Sheet: Sheet1
	SBP.Th
		Sham								Vehicle								PTH
	2W	0.08069	0.09107	0.07479	0.08904	0.08305	0.08052	0.08378	0.08007	0.08023	0.0868	0.08483	0.09051	0.08507	0.09781	0.08919	0.09335	0.07971	0.07476	0.0837	0.08156	0.09552	0.08851	0.08298	0.0856
	4W	0.08472	0.08421	0.08382	0.07794	0.07358	0.08564	0.07256	0.08424	0.08916	0.09092	0.09516	0.09924	0.10175	0.09843	0.10215	0.10882	0.09051	0.09533	0.08172	0.09387	0.08479	0.09525	0.09588	0.09117
	8W	0.08905	0.08154	0.088	0.07893	0.08535	0.08972	0.08335	0.08858	0.10096	0.10983	0.11545	0.12028	0.10812	0.1068	0.09764	0.10378	0.1092	0.10343	0.09683	0.09602	0.09789	0.09794	0.09924	0.093491
	SMI
		Sham								Vehicle								PTH
	2W	0.5862	0.52229	0.66292	0.57705	0.48367	0.66362	0.7508	0.80826	0.8616	0.65597	0.97472	0.7358	0.68188	0.83481	0.98421	0.89545	0.78104	0.79589	0.60325	0.86779	0.79202	0.63317	0.74811	1.1089
	4W	0.61824	0.5388	0.82024	0.52725	0.70313	0.53371	0.6386	0.6399	1.36085	1.56555	1.48073	1.59585	1.56886	1.45911	1.7591	1.66679	1.04069	1.09193	1.24961	1.02246	1.11587	0.99933	0.96248	1.40007
	8W	0.6382	0.65536	0.6309	0.59488	0.64281	0.59321	0.67511	0.51051	1.3646	1.46768	1.1577	1.50615	1.36835	1.36455	1.45914	1.44745	1.23957	1.01869	1.25309	1.24175	1.188	0.97902	1.44888	1.26754
	TB.Pf
		Sham								Vehicle								PTH
	2W	-3.41428	-4.90249	-4.53074	-4.30973	-1.35278	-3.70054	-4.48425	-0.11669	1.15043	0.583624	0.084264	-0.09309	-1.27674	-1.45104	-2.25441	-2.79023	-0.70077	-0.28831	-2.43198	-3.96862	-4.254	-2.25475	-2.26958	-5.49102
	4W	-3.07352	-5.37469	-5.37138	-5.60596	-4.08042	-3.10429	-1.12409	-4.61253	5.27334	4.93452	4.98646	4.30065	6.26251	4.2161	4.022	7.46311	-4.16782	0.1271	0.39374	-1.26219	-0.63837	-0.81969	-2.71729	-1.75648
	8W	-4.15846	-0.70054	-1.42842	-5.66967	-2.27006	-1.12409	-5.37469	-4.6626	3.37419	2.39177	7.70043	4.06263	5.60733	5.47045	5.21882	2.08545	2.03695	1.608	3.88322	2.25327	0.85556	-0.26011	2.75053	3.11156
	Porosity
		Sham								Vehicle								PTH
	2W	0.02938	0.033	0.02319	0.03993	0.03586	0.0266	0.02498	0.03265	0.03428	0.03555	0.05042	0.03156	0.05288	0.02855	0.04257	0.03933	0.03526	0.0448	0.04199	0.03848	0.02933	0.02527	0.03417	0.03322
	4W	0.036692	0.036478	0.030019	0.03527	0.039272	0.029323	0.038125	0.023459	0.04843	0.04946	0.04634	0.07057	0.06052	0.05213	0.04509	0.06529	0.03349	0.03473	0.04926	0.03524	0.05167	0.04814	0.04159	0.03843
	8W	0.03585	0.03564	0.03333	0.03446	0.03837	0.02865	0.03725	0.02292	0.05066	0.04737	0.05312	0.06137	0.05066	0.03568	0.05562	0.03708	0.04763	0.04085	0.04035	0.03931	0.04221	0.03264	0.02938	0.03107
