# Supplementary material for: Parathyroid hormone attenuates osteoarthritis pain by remodeling subchondral bone in mice
Source: eLife. 2021 Mar 1;10:e66532. doi: 10.7554/eLife.66532 (PMC8012060; doi:10.7554/eLife.66532)
Supplement: Figure 4—source data 1. [file elife-66532-fig4-data1.xlsx]

## Sheet: Sheet1
		nestin					osterix					psmad2/3					TRAP
		Sham	Vehicle	PTH			Sham	Vehicle	PTH			Sham	Vehicle	PTH			Sham	Vehicle	PTH
		13	43.2	24			30.8	165.6	98.4			158.4	592.8	426			20	43	69
		10.4	48	28.8			29.4	194.4	103.2			188.4	796.8	264			17	45	75
		13	50.4	24			30.8	172.8	98.4			218.4	532.8	336			23	47	58
		18.2	38.4	19.2			33.6	160.8	93.6			140.4	508.8	324			24	49	63
		10.4	40.8	21.6			29.4	151.2	96			152.4	556.8	348			14	39	60
		5.2	57.6	16.8			25.2	180	86.4			162	638.4	380.4			18	40	59
		23.4	26.4	38.4			37.8	136.8	115.2			201.6	562.8	302.4			22	56	63
		15.6	45.6	26.4			30.8	165.6	100.8			174	598.8	342			20	36	70
		Active TGF-b
			Sham								Vehicle								PTH
		4W	2.07701	2.55989	2.52048	2.35248	2.41349	1.91119	2.46129	2.69869	6.9748	8.2684	10.7591	7.28944	8.81741	5.95706	8.59705	8.3795	9.65117	11.8543	8.33743	11.3816	9.93308	9.41507	10.6129	13.2875
		8W	2.4505	2.88006	1.95617	2.75588	2.37534	2.23926	2.55395	3.65061	5.86097	6.72464	9.73446	5.91649	7.61965	5.08401	7.27885	6.23445	7.38487	8.83352	8.71528	8.21129	8.39432	6.88742	8.5377	9.24993
