# Supplementary material for: Parathyroid hormone attenuates osteoarthritis pain by remodeling subchondral bone in mice
Source: eLife. 2021 Mar 1;10:e66532. doi: 10.7554/eLife.66532 (PMC8012060; doi:10.7554/eLife.66532)
Supplement: Figure 5—source data 1. [file elife-66532-fig5-data1.xlsx]

## Sheet: Sheet1
			50%PWT
				Vehicle								PTH
			Pre-treatment	0.673391	0.686664	0.674417	0.622139	0.548187	0.686664	0.574426	0.713273	0.59802	0.622139	0.574426	0.673391	0.673391	0.548187	0.71394	0.70146
			1W	0.686664	0.514639	0.574426	0.548187	0.514639	0.574426	0.574426	0.514639	0.622139	0.574426	0.557736	0.548187	0.686664	0.673391	0.574426	0.548187
			2W	0.514639	0.574426	0.490643	0.490622	0.505326	0.514639	0.505326	0.490643	0.548187	0.557736	0.574426	0.514639	0.59802	0.574426	0.59802	0.548187
			3W	0.490643	0.514639	0.514639	0.410446	0.41305	0.410446	0.505326	0.490643	0.548187	0.514639	0.514639	0.514639	0.505326	0.574426	0.59802	0.548187
			4W	0.410446	0.490643	0.41305	0.410446	0.41305	0.410446	0.505326	0.490643	0.490622	0.548187	0.505326	0.514639	0.548187	0.574426	0.505326	0.505326
			PAM
				Vehicle								PTH
			Pre-treatment	394	369	351	337	378	353	336	315	395	370	348	342	378	355	336	316
			1W	378	356	351	340	370	355	342	321	389	357	348	348	370	357	339	322
			2W	356	329	322	312	346	326	312	291	376	349	338	337	365	347	330	311
			3W	337	313	302	284	326	312	282	266	369	345	330	319	357	345	314	298
			4W	315	293	284	274	310	288	277	253	359	337	324	326	353	333	316	297
			intensity					contact area					swing speed
			Sham	Vehicle	PTH			Sham	Vehicle	PTH			Sham	Vehicle	PTH
			101	64	73			93.8	52.04	69.1			99.86	68.4	76.72
			110.8	72.8	74			107.8	71.58	70.15			95.86	69.2	84.56
			104.8	58.8	81.4			100.8	53.88	64.9			106.34	75.12	70.96
			98.6	64.2	78.6			105.6	66.42	73.45			100.82	65.88	73
			97.4	69.6	76			95.6	62.68	60.9			100.1	70.8	69.36
			99.8	60.2	90			98.2	64.22	81.95			92.1	66	73.36
			101.6	70.8	71			101.8	58.5	68.05			97.86	56.8	76.48
			106.4	62	69.4			99.8	56.3	66.55			99.22	65.52	79.84
			CGRP					Subchondral bone PGE2					SOFG
			Sham	Vehicle	PTH			Sham	Vehicle	PTH			Sham	Vehicle	PTH
			0.876375	4.28824	2.47825			0.0859935	1.08014	0.695531			0	12	8
			1.08012	4.02421	3.48914			0.349625	0.920431	0.903339			0	9	8
			1.06349	5.58909	2.91603			0.208646	1.08014	0.788851			0	8	6
			0.992609	5.41437	3.41211			0.215882	0.976107	0.874374			1	6	4
			1.01835	4.89918	3.17597			0.332469	1.30817	0.968096			0	12	8
			0.80641	4.76638	3.09153			0.204758	1.07528	0.8686			0	9	6
			1.03852	4.6802	3.28673								1	9	8
			1.13869	5.91338	3.96727								1	9	9
			SBP.Th					TB.pf					SMI					porosity
			Sham	Vehicle	PTH			Sham	Vehicle	PTH			Sham	Vehicle	PTH			Sham	Vehicle	PTH
			0.09107	0.10039	0.10448			-2.39958	6.04781	3.10259			0.61503	1.38968	1.06952			0.03224	0.05301	0.04341
			0.08421	0.10242	0.10363			-3.05882	3.5014	2.54178			0.64707	1.59438	1.2684			0.02266	0.06254	0.04567
			0.08154	0.1141	0.10643			-5.14376	3.8073	2.70852			0.66703	1.50956	1.12076			0.04976	0.04329	0.03524
			0.07479	0.10877	0.0998			-4.51604	4.24793	2.07857			0.55112	1.39343	1.3844			0.03504	0.06014	0.02853
			0.08382	0.10685	0.09716			-5.35668	5.39263	3.95312			0.56763	1.49651	1.02129			0.02599	0.05159	0.03233
			0.088	0.11036	0.0967			-0.41372	5.25575	2.25531			0.68419	1.18653	1.27058			0.02441	0.06475	0.04103
			0.08007	0.10976	0.09817			-4.06572	3.15949	0.97904			0.5125	1.48794	1.21683			0.04167	0.0391	0.04364
			0.08424	0.10525	0.09442			-2.25536	7.14841	1.13481			0.73196	1.39338	1.10785			0.02824	0.04795	0.05282
