# Supplementary material for: Parathyroid hormone attenuates osteoarthritis pain by remodeling subchondral bone in mice
Source: eLife. 2021 Mar 1;10:e66532. doi: 10.7554/eLife.66532 (PMC8012060; doi:10.7554/eLife.66532)
Supplement: Figure 6—figure supplement 1—source data 1. [file elife-66532-fig6-figsupp1-data1.xlsx]

## Sheet: Sheet1
	SP
		Vehicle								PTH
	PTH1R-/-	2.9182	3.4246	4.3638	4.6206	3.9722	3.5846	3.4888	4.6996	2.826	4.2368	3.437	4.1292	3.707	3.5892	3.8616	4.8112
	PTH1R+/+	2.8984	4.0466	4.3364	4.5918	3.4682	3.3214	4.0262	4.5894	2.0904	3.1928	2.5678	3.1088	2.7788	2.6868	2.8998	3.6416
	P2X3
		Vehicle								PTH
	PTH1R-/-	3.62223	3.1555	2.90413	2.69942	4.00443	3.88036	4.02093	4.52848	2.70833	3.94768	2.8274	3.79701	3.33543	3.17035	3.55211	4.5611
	PTH1R+/+	3.40364	2.95838	2.71876	3.1524	3.76805	3.64986	3.92109	4.39457	3.10846	2.58588	1.7712	2.47636	2.14076	2.72066	2.29834	3.26575
	PIEZO2
		Vehicle								PTH
	PTH1R-/-	3.44289	4.31621	2.67995	4.06381	3.29015	3.0135	3.65324	4.07779	2.93498	4.58744	2.90277	4.76116	3.54371	3.10844	4.1151	4.24006
	PTH1R+/+	3.24405	3.99978	2.79469	3.78134	3.11205	3.16658	3.42618	4.48012	3.3034	3.47086	2.78714	3.19083	2.33264	2.0257	2.73542	3.628
