# Supplementary material for: Parathyroid hormone attenuates osteoarthritis pain by remodeling subchondral bone in mice
Source: eLife. 2021 Mar 1;10:e66532. doi: 10.7554/eLife.66532 (PMC8012060; doi:10.7554/eLife.66532)
Supplement: Figure 6—source data 1. [file elife-66532-fig6-data1.xlsx]

## Sheet: Sheet1
	50%PWT
		SHAM								Vehicle								PTH
	PTH1R-/-	1.08037	1.21244	1.16612	1.1153	1.33011	1.21131	1.17022	1.16612	0.505326	0.686664	0.673391	0.514639	0.59802	0.490622	0.514639	0.505326	0.70146	0.548187	0.514639	0.622139	0.514639	0.59802	0.70146	0.622139
	PTH1R+/+	1.21131	1.33011	1.21131	1.17022	1.16612	0.930955	1.16612	1.08037	0.686664	0.548187	0.514639	0.505326	0.490643	0.59802	0.557736	0.574426	0.873983	0.852604	0.849122	0.833232	0.71394	0.713273	0.833232	0.947171
	PAMWT
		SHAM								Vehicle								PTH
	PTH1R-/-	474	419	481	447	465	440	426	446	326	348	299	294	290	255	276	264	354	328	324	304	302	291	285	260
	PTH1R+/+	459	425	456	435	471	455	424	492	315	334	296	271	275	266	254	233	387	373	356	353	335	332	322	310
	Catwalk_contact area
		SHAM								Vehicle								PTH
	PTH1R-/-	98.6	94.6	93.3	98	98.4	101.2	103.1	100	75.8	70.4	73.8	75.6	76.2	80.8	79.8	77.4	71.4	75.8	77.6	74.4	74.4	73.4	83.4	77.4
	PTH1R+/+	103.4	102.4	102.4	100.2	97	94.6	103.6	98.8	77.6	77.6	75.6	74.6	80.6	84.2	78.6	73	85.4	88.6	90.6	94.4	80.2	82	83.8	86.6
	Catwalk_intensity
		SHAM								Vehicle								PTH
	PTH1R-/-	100	95	102.8	105.6	101	100.8	104.8	98.6	74.4	75.6	79.4	81.4	74.6	72	70.8	76.4	73.4	66	69	72.6	73.4	76	77.6	80.8
	PTH1R+/+	97.4	99.8	101.6	100.4	106.4	96.4	95	99.6	76.8	67.8	70.8	73.8	76.2	84.8	78.2	75.8	87	77.8	83.2	84.4	85.2	86	88	89.2
	Catwalk_swing speed
		SHAM								Vehicle								PTH
	PTH1R-/-	100.2	102.8	106.4	104.4	96.4	95.6	99	99.2	65.6	58	65	66.4	67.4	70.8	73.2	68.2	68.4	70.2	75.8	71.8	67.6	67	65.2	61.6
	PTH1R+/+	99.8	101.8	105.2	95.7	99	103.8	101.6	99.2	71.6	67.2	69.4	64.6	70.4	73.2	77	72.2	82.6	92	87.8	83.8	83.2	81.2	78	75.8
	CGRP staining
		Vehicle								PTH
	PTH1R-/-	4.89825	4.59652	6.38483	6.18525	5.59642	5.44455	5.346	6.7554	4.16542	5.82592	4.88453	5.69947	5.31158	5.17298	5.4936	6.61118
	PTH1R+/+	5.08095	4.75245	6.6987	6.12157	5.84055	5.1354	5.5683	7.10213	3.05393	4.29413	3.591	4.19963	3.90983	3.80633	4.04573	4.88047
	EMUC staiing
		Vehicle								PTH
	PTH1R-/-	3.57896	4.45183	3.7458	4.58989	3.92429	3.02041	4.06069	3.89483	3.69491	3.59364	3.82809	4.70294	3.62769	3.18211	4.21262	4.34055
	PTH1R+/+	2.98386	4.97001	3.66326	3.35523	4.3532	4.23796	4.61585	4.43392	1.97042	2.96759	2.2371	2.45099	2.59984	2.23407	2.40773	2.51274
	CGRP staining in synovium
		Vehicle								PTH
	PTH1R-/-	2.9757	3.54002	4.53001	4.80612	3.85091	3.69221	3.58921	4.2309	2.61851	4.13541	3.27546	4.01972	3.56577	3.43911	3.73199	4.9715
	PTH1R+/+	2.95441	3.76664	4.34054	4.15151	3.4251	3.66726	3.56906	4.86619	2.8692	3.9745	3.3825	3.96418	3.60937	3.51045	3.73947	4.59406
	osteophyte volume
		Vehicle								PTH
	PTH1R-/-	0.024995	0.02986	0.022845	0.02439	0.027455	0.01864	0.023825	0.02221	0.021701	0.023108	0.026108	0.025421	0.019153	0.023704	0.030348	0.028229
	PTH1R+/+	0.03219	0.02675	0.02779	0.02095	0.0202	0.02439	0.02395	0.01924	0.031678	0.028184	0.027184	0.024646	0.023632	0.023481	0.020505	0.026976
	COX2
		Vehicle								PTH
	PTH1R-/-	409.5	423.5	483	399	329	371	392	343	402.5	399	458.5	423.5	378	346.5	371	318.5
	PTH1R+/+	486.5	434	451.5	413	392	388.5	339.5	360.5	234.5	262.5	332.5	315	185.5	262.5	287	273
	Subchondral bone PGE2
		Vehicle								PTH
	PTH1R-/-	394	550	515	578	417	601	478	513	550	503	434	488	366	449	459	467
	PTH1R+/+	407	482	449	489	609	535	502	574	207	223	289	382	407	253	323	284
