# Supplementary material for: Parathyroid hormone attenuates osteoarthritis pain by remodeling subchondral bone in mice
Source: eLife. 2021 Mar 1;10:e66532. doi: 10.7554/eLife.66532 (PMC8012060; doi:10.7554/eLife.66532)
Supplement: Figure 7—source data 1. [file elife-66532-fig7-data1.xlsx]

## Sheet: Sheet1
	OARSI
		Sham								Vehicle								PTH
	PTH1R-/-	0	1	1	1	2	1	1	1	9	12	10	9	10	9	12	9	8	6	10	9	8	8	9	9
	PTH1R+/+	1	2	2	1	1	2	0	1	12	9	9	10	12	8	10	9	6	8	6	9	6	6	4	6
	TB.Pf
		SHAM								Vehicle								PTH
	PTH1R-/-	-2.44532	0.45232	-1.76831	1.53492	-3.21019	-0.84552	-1.36778	-1.85599	7.40418	5.9311	5.55183	6.75439	6.5982	5.15781	3.85109	3.33938	6.47491	4.0542	5.81617	5.20812	5.05391	5.02909	3.60444	5.5217
	PTH1R+/+	0.33492	-1.21019	-0.59404	-1.24628	-3.26778	-2.86323	-3.08424	-1.65599	4.74051	4.67625	3.77519	2.73149	3.7414	6.80095	4.5903	1.73185	2.83037	3.29701	1.64108	2.4649	2.28358	0.38598	1.34679	-0.14033
	SBP.TH
		SHAM								Vehicle								PTH
	PTH1R-/-	0.06978	0.0713	0.06767	0.07083	0.06733	0.07479	0.07832	0.08039	0.10267	0.10385	0.10054	0.10799	0.09919	0.09649	0.10683	0.0928	0.10042	0.10947	0.10047	0.10733	0.09658	0.10054	0.09998	0.09252
	PTH1R+/+	0.07832	0.08039	0.07114	0.07315	0.07249	0.07394	0.06978	0.0713	0.10833	0.10289	0.10393	0.09709	0.11094	0.100532	0.10709	0.10538	0.09498	0.09607	0.09607	0.09786	0.10075	0.10427	0.09703	0.09229
	SMI
		SHAM								Vehicle								PTH
	PTH1R-/-	0.59578	0.89786	0.81364	0.80305	0.73534	0.70085	0.46914	0.69366	1.35539	1.34168	1.64168	1.54604	1.4018	1.15805	1.31412	1.20108	1.5662	1.27916	1.57662	1.47082	1.45533	1.39126	1.24654	1.12851
	PTH1R+/+	0.49214	0.31666	0.63537	0.3804	0.61562	0.63884	0.79064	0.67785	1.55728	1.49842	1.21341	1.3794	1.19144	1.5807	1.39574	1.09684	1.26097	1.25947	1.31811	1.25765	0.95736	0.9466	1.05952	1.08916
	POROSITY
		SHAM								vehicle								PTH
	PTH1R-/-	0.0253035	0.0226192	0.0385205	0.0408683	0.0327458	0.0313963	0.0305205	0.0430535	0.06391	0.04715	0.0676	0.05886	0.05437	0.04938	0.03858	0.05547	0.06102	0.05209	0.05215	0.04762	0.05564	0.05541	0.06371	0.03795
	PTH1R+/+	0.0222663	0.035165	0.0278526	0.0341813	0.0303211	0.0292441	0.0317346	0.0449957	0.06125	0.06669	0.04727	0.04223	0.06158	0.05351	0.05661	0.06264	0.05533	0.05164	0.04235	0.03841	0.04613	0.03189	0.03571	0.03547
	pSmad2/3
		Vehicle								PTH
	PTH1R-/-	394	550	515	578	417	601	478	513	550	503	434	488	366	449	459	467
	PTH1R+/+	407	482	449	489	609	535	502	574	207	223	289	382	407	253	323	284
	nestin
		Vehicle								PTH
	PTH1R-/-	48	38	42	38	40	26	30	44	48	22	36	28	42	36	38	30
	PTH1R+/+	32	48	40	36	36	24	30	34	24	32	18	12	22	18	22	26
	osterix
		Vehicle								PTH
	PTH1R-/-	134	124	146	164	156	148	146	142	166	144	116	124	138	148	144	138
	PTH1R+/+	138	128	112	124	134	166	148	138	64	80	94	108	86	74	56	76
